# Supplementary material
Source: PubMed Central journal article supplement (PMC4715459)
Supplement: NIHMS746667-supplement-1.pdf [file NIHMS746667-supplement-1.pdf]

**Structure, Volume 24**

**Supplemental Information**

**New Dynamic Rotamer Libraries: Data-Driven**

**Analysis of Side-Chain Conformational Propensities**

**Clare-Louise Towse, Steven J. Rysavy, Ivan M. Vulovic, and Valerie Daggett**

## **Supplemental Data**

### **New Dynamic Rotamer Libraries: Data-Driven Analysis of Side Chain Conformational Propensities**

**Clare-Louise Towse, Steven J. Rysavy, Ivan M. Vulovic and Valerie Daggett**

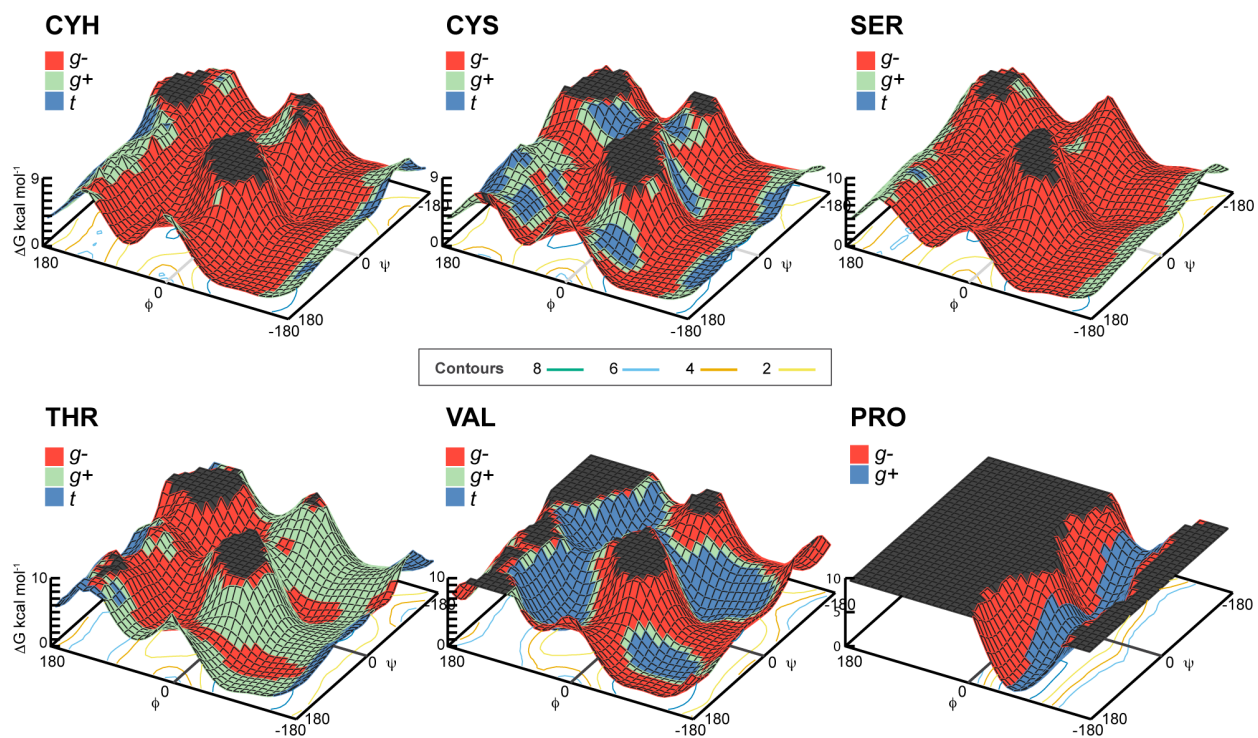

**Figure S1:** (Related to Figure 6) Rotamer preferences taken from the backbone-dependent (BBDEP) rotamer library for amino acids with only one side chain  $\chi$ -angle. Free energy landscapes of the  $\phi/\psi$  distributions are shown with the landscapes colored by the preferred rotamer associated with the backbone angles within  $5^\circ \times 5^\circ$  degree  $\phi/\psi$  bins to illustrate the relationship between rotameric propensities and the relative energies of backbone conformations. Insurmountable energy barriers are shaded black.

Pure Rotameric Side Chains

ILE

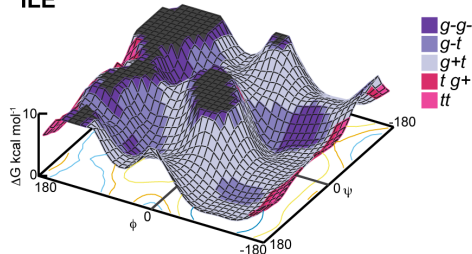

LEU

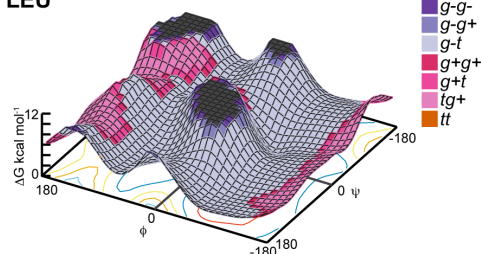

LYS

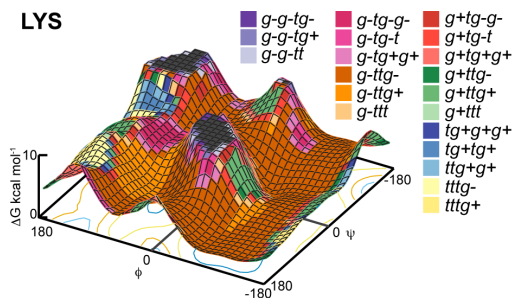

MET

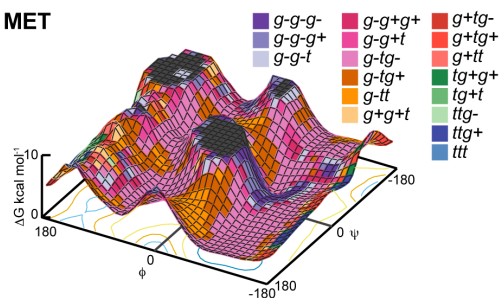

Aromatic Side Chains

TRP

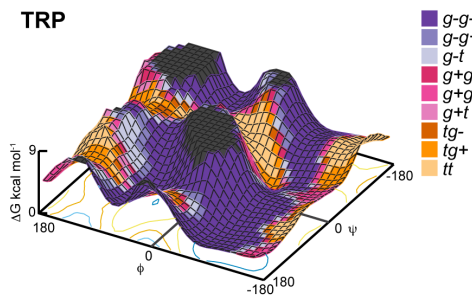

TYR

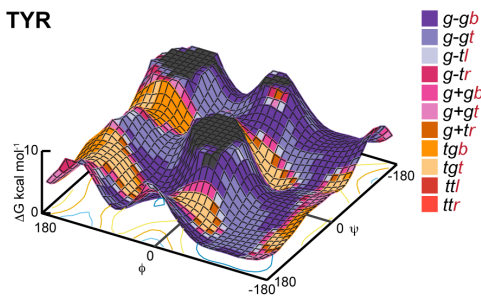

Amide Side Chain

ASN

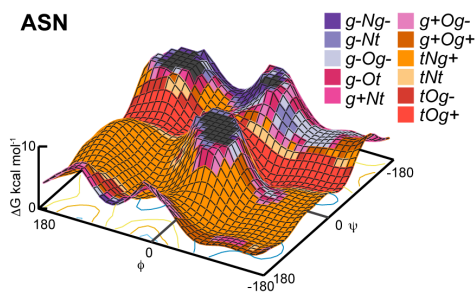

Charged Side Chains

ASP

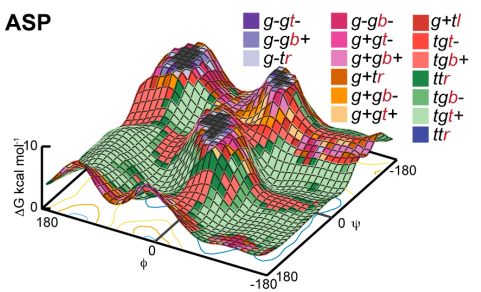

HID

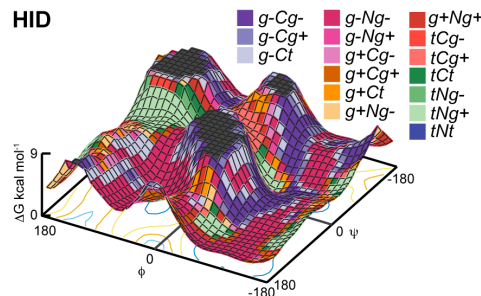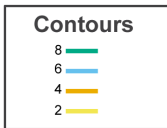

**Figure S2:** (Related to Figure 6) Rotamer preferences taken from the backbone-dependent (BBDEP) rotamer library for a selection of amino acids with longer side chains and representing different side chain functional groups. Free energy landscapes of the  $\phi/\psi$  distributions are shown with the landscapes colored by the preferred rotamer associated with the backbone angles within  $5^\circ \times 5^\circ$  degree  $\phi/\psi$  bins to illustrate the relationship between rotameric propensities and the relative energies of backbone conformations. Insurmountable energy barriers are shaded black. Rotamer definitions are as provided in Figure 6, where a residue has split bin definitions, part of the rotamer label is highlighted in red to denote the precise top, bottom, left or right portion of the bin populated.

**Table S1:** (Related to Figures 5, 8 and 9) Independent (BBIND) and secondary structure region-dependent (RSS) rotamer probabilities. Percentage populations lower than 0.01 are indicated as such to acknowledge that, while substantially smaller populations, rotamer instances were observed in order to delineate from cases where there were no rotamer samples.

| Residue | $\chi^1$ | $\chi^2$ | $\chi^3$ | $\chi^4$ | BBIND  | RSS        | RSS             | RSS        | RSS     | RSS       | RSS      |
|---------|----------|----------|----------|----------|--------|------------|-----------------|------------|---------|-----------|----------|
|         |          |          |          |          |        | $\alpha_R$ | Near $\alpha_R$ | $\alpha_L$ | $\beta$ | $P_{III}$ | $P_{IR}$ |
| ARG     | g+       | g+       | g+       | g+       | 0.02%  | 0.02%      | <0.01%          | <0.01%     | 0.03%   | <0.01%    | <0.01%   |
| ARG     | g+       | g+       | g+       | t        | 0.03%  | 0.02%      | <0.01%          | <0.01%     | 0.03%   | 0.12%     | 0.01%    |
| ARG     | g+       | g+       | g+       | g-       | <0.01% | <0.01%     | <0.01%          | <0.01%     | 0.01%   | <0.01%    | -        |
| ARG     | g+       | g+       | t        | g+       | 0.01%  | <0.01%     | <0.01%          | <0.01%     | 0.01%   | 0.06%     | <0.01%   |
| ARG     | g+       | g+       | t        | t        | 0.08%  | 0.01%      | 0.07%           | <0.01%     | 0.24%   | 0.18%     | 0.01%    |
| ARG     | g+       | g+       | t        | g-       | 0.01%  | <0.01%     | 0.08%           | -          | 0.02%   | 0.02%     | <0.01%   |
| ARG     | g+       | g+       | g-       | g+       | <0.01% | <0.01%     | <0.01%          | -          | <0.01%  | -         | <0.01%   |
| ARG     | g+       | g+       | g-       | t        | 0.02%  | <0.01%     | 0.17%           | 0.01%      | 0.01%   | 0.01%     | <0.01%   |
| ARG     | g+       | g+       | g-       | g-       | 0.01%  | <0.01%     | 0.01%           | -          | 0.01%   | 0.01%     | <0.01%   |
| ARG     | g+       | t        | g+       | g+       | 0.48%  | 0.10%      | 0.58%           | 0.03%      | 1.17%   | 0.77%     | 1.51%    |
| ARG     | g+       | t        | g+       | t        | 0.86%  | 0.15%      | 0.98%           | 0.05%      | 1.75%   | 1.72%     | 1.65%    |
| ARG     | g+       | t        | g+       | g-       | 0.08%  | 0.01%      | 0.10%           | <0.01%     | 0.24%   | 0.12%     | 0.07%    |
| ARG     | g+       | t        | t        | g+       | 0.68%  | 0.24%      | 1.11%           | 0.01%      | 1.35%   | 1.15%     | 0.45%    |
| ARG     | g+       | t        | t        | t        | 0.64%  | 0.13%      | 0.72%           | <0.01%     | 1.86%   | 1.16%     | 0.76%    |
| ARG     | g+       | t        | t        | g-       | 0.39%  | 0.11%      | 0.25%           | 0.01%      | 0.96%   | 0.81%     | 0.22%    |
| ARG     | g+       | t        | g-       | g+       | 0.08%  | 0.03%      | 0.05%           | <0.01%     | 0.20%   | 0.18%     | 0.01%    |
| ARG     | g+       | t        | g-       | t        | 0.70%  | 0.15%      | 0.69%           | 0.02%      | 1.70%   | 1.46%     | 0.71%    |
| ARG     | g+       | t        | g-       | g-       | 0.44%  | 0.25%      | 0.40%           | 0.01%      | 0.76%   | 0.87%     | 0.35%    |
| ARG     | g+       | g-       | g+       | g+       | 0.01%  | <0.01%     | 0.01%           | <0.01%     | <0.01%  | 0.01%     | <0.01%   |
| ARG     | g+       | g-       | g+       | t        | <0.01% | <0.01%     | <0.01%          | -          | <0.01%  | <0.01%    | <0.01%   |
| ARG     | g+       | g-       | g+       | g-       | <0.01% | <0.01%     | <0.01%          | -          | <0.01%  | <0.01%    | <0.01%   |
| ARG     | g+       | g-       | t        | g+       | <0.01% | <0.01%     | 0.02%           | -          | <0.01%  | <0.01%    | <0.01%   |
| ARG     | g+       | g-       | t        | t        | 0.01%  | <0.01%     | 0.02%           | <0.01%     | 0.05%   | 0.01%     | 0.04%    |
| ARG     | g+       | g-       | t        | g-       | 0.01%  | <0.01%     | <0.01%          | -          | 0.03%   | 0.01%     | <0.01%   |
| ARG     | g+       | g-       | g-       | g+       | <0.01% | <0.01%     | <0.01%          | -          | 0.02%   | <0.01%    | <0.01%   |
| ARG     | g+       | g-       | g-       | t        | 0.02%  | <0.01%     | 0.01%           | -          | 0.03%   | 0.07%     | <0.01%   |
| ARG     | g+       | g-       | g-       | g-       | <0.01% | <0.01%     | <0.01%          | -          | <0.01%  | 0.01%     | <0.01%   |
| ARG     | t        | g+       | g+       | g+       | 0.31%  | 0.34%      | 0.31%           | 0.18%      | 0.33%   | 0.11%     | 0.36%    |
| ARG     | t        | g+       | g+       | t        | 0.75%  | 0.89%      | 1.04%           | 0.73%      | 0.65%   | 0.34%     | 0.52%    |
| ARG     | t        | g+       | g+       | g-       | 0.05%  | 0.06%      | 0.03%           | <0.01%     | 0.06%   | 0.02%     | 0.09%    |
| ARG     | t        | g+       | t        | g+       | 0.58%  | 0.85%      | 0.64%           | 0.01%      | 0.38%   | 0.18%     | 0.64%    |
| ARG     | t        | g+       | t        | t        | 1.26%  | 1.87%      | 0.86%           | 0.36%      | 0.91%   | 0.44%     | 0.33%    |
| ARG     | t        | g+       | t        | g-       | 0.47%  | 0.59%      | 0.66%           | 0.18%      | 0.31%   | 0.36%     | 0.20%    |
| ARG     | t        | g+       | g-       | g+       | 0.08%  | 0.14%      | 0.01%           | <0.01%     | 0.02%   | <0.01%    | <0.01%   |
| ARG     | t        | g+       | g-       | t        | 0.11%  | 0.14%      | 0.06%           | 0.12%      | 0.11%   | 0.05%     | 0.04%    |
| ARG     | t        | g+       | g-       | g-       | 0.27%  | 0.38%      | 0.60%           | 0.01%      | 0.09%   | 0.08%     | 0.17%    |
| ARG     | t        | t        | g+       | g+       | 2.75%  | 4.36%      | 1.15%           | 0.27%      | 1.21%   | 1.07%     | 1.18%    |
| ARG     | t        | t        | g+       | t        | 3.37%  | 4.08%      | 1.45%           | 2.18%      | 3.43%   | 2.59%     | 2.49%    |
| ARG     | t        | t        | g+       | g-       | 0.62%  | 1.06%      | 0.17%           | 0.05%      | 0.23%   | 0.13%     | 0.07%    |
| ARG     | t        | t        | t        | g+       | 0.71%  | 0.70%      | 0.72%           | 0.38%      | 1.05%   | 0.58%     | 0.68%    |
| ARG     | t        | t        | t        | t        | 1.92%  | 1.68%      | 1.34%           | 0.95%      | 3.43%   | 1.93%     | 2.36%    |
| ARG     | t        | t        | t        | g-       | 1.05%  | 1.17%      | 0.40%           | 0.17%      | 1.53%   | 0.67%     | 2.23%    |
| ARG     | t        | t        | g-       | g+       | 0.45%  | 0.71%      | 0.25%           | 0.04%      | 0.21%   | 0.14%     | 0.13%    |
| ARG     | t        | t        | g-       | t        | 2.22%  | 2.65%      | 2.31%           | 1.16%      | 2.49%   | 0.98%     | 2.23%    |
| ARG     | t        | t        | g-       | g-       | 1.17%  | 1.24%      | 1.29%           | 0.99%      | 1.44%   | 0.82%     | 0.84%    |
| ARG     | t        | g-       | g+       | g+       | 0.03%  | 0.02%      | 0.07%           | <0.01%     | 0.01%   | <0.01%    | 0.41%    |
| ARG     | t        | g-       | g+       | t        | 0.03%  | 0.03%      | 0.02%           | 0.03%      | 0.04%   | 0.01%     | 0.10%    |
| ARG     | t        | g-       | g+       | g-       | <0.01% | <0.01%     | <0.01%          | <0.01%     | <0.01%  | <0.01%    | <0.01%   |

| Residue | $\chi^1$ | $\chi^2$ | $\chi^3$ | $\chi^4$ | BBIND  | RSS        | RSS             | RSS        | RSS     | RSS       | RSS      |
|---------|----------|----------|----------|----------|--------|------------|-----------------|------------|---------|-----------|----------|
|         |          |          |          |          |        | $\alpha_R$ | Near $\alpha_R$ | $\alpha_L$ | $\beta$ | $P_{III}$ | $P_{IR}$ |
| ARG     | t        | g-       | t        | g+       | 0.11%  | 0.12%      | 0.06%           | 0.10%      | 0.11%   | 0.10%     | 0.08%    |
| ARG     | t        | g-       | t        | t        | 0.32%  | 0.28%      | 0.17%           | 0.05%      | 0.62%   | 0.36%     | 0.69%    |
| ARG     | t        | g-       | t        | g-       | 0.05%  | 0.06%      | 0.08%           | <0.01%     | 0.07%   | 0.01%     | 0.11%    |
| ARG     | t        | g-       | g-       | g+       | 0.09%  | 0.07%      | 0.02%           | 0.33%      | 0.17%   | 0.04%     | 0.11%    |
| ARG     | t        | g-       | g-       | t        | 0.41%  | 0.61%      | 0.40%           | 0.09%      | 0.19%   | 0.18%     | 0.09%    |
| ARG     | t        | g-       | g-       | g-       | 0.06%  | 0.07%      | 0.05%           | 0.11%      | 0.08%   | 0.02%     | 0.19%    |
| ARG     | g-       | g+       | g+       | g+       | 0.17%  | 0.17%      | 0.39%           | 0.13%      | 0.11%   | 0.22%     | 0.06%    |
| ARG     | g-       | g+       | g+       | t        | 0.44%  | 0.48%      | 0.75%           | 0.76%      | 0.33%   | 0.25%     | 0.29%    |
| ARG     | g-       | g+       | g+       | g-       | 0.04%  | <0.01%     | 0.01%           | 0.03%      | 0.02%   | 0.02%     | 0.02%    |
| ARG     | g-       | g+       | t        | g+       | 0.10%  | 0.04%      | 0.23%           | 0.11%      | 0.18%   | 0.09%     | 0.47%    |
| ARG     | g-       | g+       | t        | t        | 0.39%  | 0.30%      | 0.70%           | 0.54%      | 0.49%   | 0.45%     | 0.49%    |
| ARG     | g-       | g+       | t        | g-       | 0.11%  | 0.08%      | 0.16%           | 0.14%      | 0.18%   | 0.09%     | 0.14%    |
| ARG     | g-       | g+       | g-       | g+       | 0.01%  | <0.01%     | <0.01%          | <0.01%     | 0.01%   | 0.02%     | <0.01%   |
| ARG     | g-       | g+       | g-       | t        | 0.11%  | 0.19%      | 0.03%           | 0.04%      | 0.04%   | 0.04%     | 0.01%    |
| ARG     | g-       | g+       | g-       | g-       | 0.03%  | 0.03%      | 0.04%           | 0.01%      | 0.02%   | 0.05%     | 0.05%    |
| ARG     | g-       | t        | g+       | g+       | 4.67%  | 4.60%      | 4.29%           | 7.68%      | 4.41%   | 4.63%     | 4.24%    |
| ARG     | g-       | t        | g+       | t        | 11.72% | 11.58%     | 11.42%          | 12.40%     | 10.64%  | 13.00%    | 13.00%   |
| ARG     | g-       | t        | g+       | g-       | 0.75%  | 0.54%      | 0.75%           | 0.82%      | 0.97%   | 1.12%     | 1.44%    |
| ARG     | g-       | t        | t        | g+       | 3.48%  | 3.01%      | 3.42%           | 4.45%      | 3.89%   | 4.42%     | 3.80%    |
| ARG     | g-       | t        | t        | t        | 11.68% | 13.08%     | 9.68%           | 11.80%     | 9.63%   | 10.09%    | 11.63%   |
| ARG     | g-       | t        | t        | g-       | 4.00%  | 3.53%      | 4.12%           | 4.76%      | 4.46%   | 5.15%     | 3.25%    |
| ARG     | g-       | t        | g-       | g+       | 2.17%  | 2.70%      | 2.16%           | 1.40%      | 1.28%   | 1.26%     | 1.94%    |
| ARG     | g-       | t        | g-       | t        | 10.92% | 7.28%      | 13.41%          | 21.19%     | 13.18%  | 15.14%    | 15.87%   |
| ARG     | g-       | t        | g-       | g-       | 11.06% | 13.61%     | 9.02%           | 12.80%     | 6.36%   | 8.14%     | 8.45%    |
| ARG     | g-       | g-       | g+       | g+       | 0.69%  | 1.00%      | 0.39%           | 0.28%      | 0.32%   | 0.43%     | 0.11%    |
| ARG     | g-       | g-       | g+       | t        | 0.83%  | 0.69%      | 2.04%           | 0.37%      | 0.90%   | 0.97%     | 0.82%    |
| ARG     | g-       | g-       | g+       | g-       | 0.13%  | 0.17%      | 0.13%           | 0.11%      | 0.09%   | 0.13%     | 0.03%    |
| ARG     | g-       | g-       | t        | g+       | 1.30%  | 1.08%      | 1.57%           | 1.75%      | 1.45%   | 1.52%     | 1.34%    |
| ARG     | g-       | g-       | t        | t        | 3.76%  | 3.41%      | 5.46%           | 3.38%      | 3.46%   | 4.58%     | 2.67%    |
| ARG     | g-       | g-       | t        | g-       | 2.16%  | 1.39%      | 4.65%           | 1.83%      | 3.79%   | 1.73%     | 3.60%    |
| ARG     | g-       | g-       | g-       | g+       | 0.40%  | 0.54%      | 0.20%           | 0.05%      | 0.21%   | 0.32%     | 0.06%    |
| ARG     | g-       | g-       | g-       | t        | 3.64%  | 3.87%      | 3.67%           | 3.42%      | 2.64%   | 4.00%     | 2.32%    |
| ARG     | g-       | g-       | g-       | g-       | 1.41%  | 1.23%      | 1.85%           | 1.12%      | 1.32%   | 2.19%     | 1.75%    |
| ASN     | g+       | Ng+      |          |          | 0.15%  | 0.05%      | 0.10%           | 0.01%      | 0.39%   | 0.22%     | 0.11%    |
| ASN     | g+       | Og-      |          |          | 1.01%  | 0.22%      | 0.41%           | 0.02%      | 1.97%   | 3.25%     | 0.39%    |
| ASN     | g+       | Nt       |          |          | 0.87%  | 0.08%      | 0.23%           | <0.01%     | 1.65%   | 2.56%     | 0.34%    |
| ASN     | g+       | Og+      |          |          | 2.38%  | 0.33%      | 1.14%           | 0.12%      | 4.00%   | 8.38%     | 1.32%    |
| ASN     | g+       | Ng-      |          |          | 0.25%  | 0.07%      | 0.23%           | 0.02%      | 0.38%   | 0.55%     | 0.40%    |
| ASN     | g+       | Ot       |          |          | <0.01% | -          | -               | -          | <0.01%  | <0.01%    | <0.01%   |
| ASN     | t        | Ng+      |          |          | 25.68% | 16.67%     | 18.33%          | 46.06%     | 35.35%  | 26.84%    | 42.35%   |
| ASN     | t        | Og-      |          |          | 20.39% | 16.14%     | 18.43%          | 28.71%     | 24.46%  | 24.14%    | 24.29%   |
| ASN     | t        | Nt       |          |          | 11.18% | 15.45%     | 14.84%          | 6.76%      | 6.97%   | 4.76%     | 8.96%    |
| ASN     | t        | Og+      |          |          | 25.14% | 39.03%     | 37.30%          | 7.15%      | 12.01%  | 11.21%    | 9.14%    |
| ASN     | t        | Ng-      |          |          | 1.05%  | 0.95%      | 1.07%           | 0.95%      | 1.38%   | 1.02%     | 1.45%    |
| ASN     | t        | Ot       |          |          | 0.19%  | 0.17%      | 0.14%           | 0.19%      | 0.29%   | 0.08%     | 0.45%    |
| ASN     | g-       | Ng+      |          |          | 0.62%  | 0.80%      | 0.41%           | 0.26%      | 0.59%   | 0.58%     | 0.39%    |
| ASN     | g-       | Og-      |          |          | 5.27%  | 5.26%      | 3.17%           | 3.29%      | 4.72%   | 7.42%     | 5.27%    |
| ASN     | g-       | Nt       |          |          | 2.09%  | 2.85%      | 0.82%           | 0.70%      | 1.42%   | 2.98%     | 0.80%    |
| ASN     | g-       | Og+      |          |          | 1.85%  | 1.12%      | 1.76%           | 1.93%      | 2.30%   | 3.11%     | 1.94%    |
| ASN     | g-       | Ng-      |          |          | 1.83%  | 0.76%      | 1.54%           | 3.78%      | 2.08%   | 2.86%     | 2.36%    |
| ASN     | g-       | Ot       |          |          | 0.05%  | 0.06%      | 0.07%           | 0.04%      | 0.04%   | 0.05%     | 0.04%    |
| ASP     | g+       | g+       |          |          | 1.40%  | 0.16%      | 0.22%           | 1.16%      | 3.60%   | 3.69%     | 1.61%    |
| ASP     | g+       | t        |          |          | 0.30%  | 0.07%      | <0.01%          | <0.01%     | 0.84%   | 0.62%     | 0.45%    |
| ASP     | g+       | g-       |          |          | 2.56%  | 0.32%      | 0.36%           | 1.18%      | 5.48%   | 7.27%     | 3.57%    |

| Residue | $\chi^1$ | $\chi^2$ | $\chi^3$ | $\chi^4$ | BBIND  | RSS        | RSS             | RSS        | RSS     | RSS       | RSS      |
|---------|----------|----------|----------|----------|--------|------------|-----------------|------------|---------|-----------|----------|
|         |          |          |          |          |        | $\alpha_R$ | Near $\alpha_R$ | $\alpha_L$ | $\beta$ | $P_{III}$ | $P_{IR}$ |
| ASP     | t        | g+       |          |          | 66.45% | 74.31%     | 75.36%          | 75.20%     | 46.99%  | 39.72%    | 65.41%   |
| ASP     | t        | t        |          |          | 7.38%  | 6.71%      | 7.48%           | 5.94%      | 8.41%   | 5.35%     | 11.24%   |
| ASP     | t        | g-       |          |          | 12.81% | 10.23%     | 10.67%          | 11.97%     | 19.14%  | 22.33%    | 11.95%   |
| ASP     | g-       | g+       |          |          | 2.10%  | 1.62%      | 1.09%           | 1.22%      | 3.97%   | 6.09%     | 1.41%    |
| ASP     | g-       | t        |          |          | 1.48%  | 1.81%      | 0.67%           | 0.40%      | 1.78%   | 4.09%     | 0.33%    |
| ASP     | g-       | g-       |          |          | 5.51%  | 4.77%      | 4.15%           | 2.92%      | 9.78%   | 10.84%    | 4.02%    |
| CYH     | g+       |          |          |          | 14.00% | 2.83%      | 13.44%          | 1.69%      | 25.15%  | 20.62%    | 25.15%   |
| CYH     | t        |          |          |          | 16.97% | 23.23%     | 20.05%          | 13.83%     | 13.39%  | 10.25%    | 17.16%   |
| CYH     | g-       |          |          |          | 69.03% | 73.94%     | 66.51%          | 84.48%     | 61.46%  | 69.13%    | 57.69%   |
| CYS     | g+       |          |          |          | 13.64% | 3.36%      | 17.44%          | 3.18%      | 18.21%  | 18.80%    | 15.92%   |
| CYS     | t        |          |          |          | 30.17% | 43.79%     | 29.08%          | 34.61%     | 28.03%  | 17.34%    | 39.64%   |
| CYS     | g-       |          |          |          | 56.19% | 52.85%     | 53.48%          | 62.21%     | 53.76%  | 63.86%    | 44.43%   |
| GLN     | g+       | g+       | Ng+      |          | 0.01%  | <0.01%     | 0.01%           | <0.01%     | 0.02%   | 0.03%     | 0.01%    |
| GLN     | g+       | g+       | Og-      |          | 0.01%  | <0.01%     | <0.01%          | <0.01%     | 0.01%   | 0.02%     | <0.01%   |
| GLN     | g+       | g+       | Nt       |          | <0.01% | <0.01%     | <0.01%          | -          | 0.02%   | 0.02%     | <0.01%   |
| GLN     | g+       | g+       | Og+      |          | 0.01%  | <0.01%     | <0.01%          | <0.01%     | 0.04%   | 0.03%     | <0.01%   |
| GLN     | g+       | g+       | Ng-      |          | <0.01% | <0.01%     | <0.01%          | -          | <0.01%  | <0.01%    | <0.01%   |
| GLN     | g+       | g+       | Ot       |          | <0.01% | <0.01%     | -               | -          | <0.01%  | <0.01%    | <0.01%   |
| GLN     | g+       | t        | Ng+      |          | 0.52%  | 0.08%      | 0.60%           | 0.02%      | 1.46%   | 0.94%     | 1.39%    |
| GLN     | g+       | t        | Og-      |          | 0.51%  | 0.10%      | 0.61%           | 0.02%      | 1.41%   | 0.98%     | 1.27%    |
| GLN     | g+       | t        | Nt       |          | 0.29%  | 0.03%      | 0.26%           | 0.02%      | 0.98%   | 0.69%     | 0.66%    |
| GLN     | g+       | t        | Og+      |          | 0.58%  | 0.09%      | 0.53%           | 0.03%      | 1.78%   | 1.29%     | 1.10%    |
| GLN     | g+       | t        | Ng-      |          | 0.42%  | 0.06%      | 0.34%           | 0.02%      | 1.29%   | 1.02%     | 0.57%    |
| GLN     | g+       | t        | Ot       |          | 0.08%  | 0.01%      | 0.08%           | <0.01%     | 0.28%   | 0.18%     | 0.16%    |
| GLN     | g+       | g-       | Ng+      |          | <0.01% | <0.01%     | <0.01%          | <0.01%     | <0.01%  | <0.01%    | <0.01%   |
| GLN     | g+       | g-       | Og-      |          | 0.01%  | <0.01%     | <0.01%          | <0.01%     | 0.04%   | 0.01%     | 0.01%    |
| GLN     | g+       | g-       | Nt       |          | 0.01%  | <0.01%     | <0.01%          | -          | 0.02%   | 0.01%     | <0.01%   |
| GLN     | g+       | g-       | Og+      |          | 0.04%  | 0.02%      | -               | <0.01%     | 0.06%   | 0.13%     | 0.03%    |
| GLN     | g+       | g-       | Ng-      |          | 0.03%  | 0.01%      | 0.01%           | <0.01%     | 0.07%   | 0.07%     | 0.03%    |
| GLN     | g+       | g-       | Ot       |          | <0.01% | <0.01%     | <0.01%          | <0.01%     | <0.01%  | <0.01%    | <0.01%   |
| GLN     | t        | g+       | Ng+      |          | 0.45%  | 0.52%      | 0.36%           | 0.23%      | 0.55%   | 0.30%     | 0.38%    |
| GLN     | t        | g+       | Og-      |          | 0.20%  | 0.19%      | 0.13%           | 0.09%      | 0.33%   | 0.31%     | 0.15%    |
| GLN     | t        | g+       | Nt       |          | 0.12%  | 0.15%      | 0.10%           | 0.05%      | 0.11%   | 0.07%     | 0.09%    |
| GLN     | t        | g+       | Og+      |          | 0.65%  | 0.86%      | 0.45%           | 0.26%      | 0.61%   | 0.26%     | 0.27%    |
| GLN     | t        | g+       | Ng-      |          | 0.04%  | 0.05%      | 0.03%           | 0.01%      | 0.02%   | 0.02%     | 0.02%    |
| GLN     | t        | g+       | Ot       |          | 0.01%  | 0.01%      | 0.01%           | <0.01%     | 0.01%   | 0.01%     | <0.01%   |
| GLN     | t        | t        | Ng+      |          | 1.45%  | 1.38%      | 1.19%           | 1.20%      | 2.32%   | 1.28%     | 1.94%    |
| GLN     | t        | t        | Og-      |          | 1.74%  | 1.66%      | 1.70%           | 1.42%      | 2.67%   | 1.59%     | 2.21%    |
| GLN     | t        | t        | Nt       |          | 1.10%  | 1.10%      | 1.07%           | 0.62%      | 1.53%   | 1.11%     | 1.30%    |
| GLN     | t        | t        | Og+      |          | 2.09%  | 2.05%      | 1.93%           | 1.11%      | 3.31%   | 1.68%     | 2.85%    |
| GLN     | t        | t        | Ng-      |          | 1.43%  | 1.49%      | 1.41%           | 1.02%      | 1.91%   | 0.95%     | 1.88%    |
| GLN     | t        | t        | Ot       |          | 0.26%  | 0.25%      | 0.22%           | 0.22%      | 0.45%   | 0.19%     | 0.37%    |
| GLN     | t        | g-       | Ng+      |          | 0.01%  | 0.01%      | 0.01%           | <0.01%     | 0.01%   | <0.01%    | 0.01%    |
| GLN     | t        | g-       | Og-      |          | 0.14%  | 0.17%      | 0.13%           | 0.06%      | 0.16%   | 0.07%     | 0.21%    |
| GLN     | t        | g-       | Nt       |          | 0.04%  | 0.04%      | 0.06%           | 0.02%      | 0.04%   | 0.03%     | 0.04%    |
| GLN     | t        | g-       | Og+      |          | 0.06%  | 0.04%      | 0.03%           | 0.04%      | 0.13%   | 0.08%     | 0.05%    |
| GLN     | t        | g-       | Ng-      |          | 0.10%  | 0.11%      | 0.09%           | 0.07%      | 0.17%   | 0.07%     | 0.10%    |
| GLN     | t        | g-       | Ot       |          | <0.01% | <0.01%     | <0.01%          | <0.01%     | <0.01%  | <0.01%    | <0.01%   |
| GLN     | g-       | g+       | Ng+      |          | 0.43%  | 0.48%      | 0.48%           | 0.47%      | 0.28%   | 0.40%     | 0.22%    |
| GLN     | g-       | g+       | Og-      |          | 0.83%  | 1.04%      | 0.32%           | 0.27%      | 0.42%   | 1.08%     | 0.16%    |
| GLN     | g-       | g+       | Nt       |          | 0.34%  | 0.39%      | 0.19%           | 0.09%      | 0.21%   | 0.56%     | 0.15%    |
| GLN     | g-       | g+       | Og+      |          | 0.45%  | 0.39%      | 0.48%           | 0.63%      | 0.57%   | 0.52%     | 0.50%    |
| GLN     | g-       | g+       | Ng-      |          | 0.01%  | 0.01%      | 0.01%           | 0.01%      | 0.02%   | 0.01%     | 0.01%    |
| GLN     | g-       | g+       | Ot       |          | <0.01% | <0.01%     | <0.01%          | <0.01%     | <0.01%  | <0.01%    | <0.01%   |



| Residue | $\chi^1$ | $\chi^2$ | $\chi^3$ | $\chi^4$ | BBIND  | RSS        | RSS             | RSS        | RSS     | RSS       | RSS      |
|---------|----------|----------|----------|----------|--------|------------|-----------------|------------|---------|-----------|----------|
|         |          |          |          |          |        | $\alpha_R$ | Near $\alpha_R$ | $\alpha_L$ | $\beta$ | $P_{III}$ | $P_{IR}$ |
| GLN     | g-       | t        | Ng+      |          | 10.84% | 10.87%     | 11.33%          | 11.81%     | 10.14%  | 11.29%    | 9.94%    |
| GLN     | g-       | t        | Og-      |          | 17.59% | 16.77%     | 18.73%          | 18.75%     | 17.49%  | 19.16%    | 18.26%   |
| GLN     | g-       | t        | Nt       |          | 10.62% | 10.96%     | 10.28%          | 11.12%     | 9.10%   | 10.43%    | 9.79%    |
| GLN     | g-       | t        | Og+      |          | 20.10% | 22.67%     | 17.62%          | 21.51%     | 15.16%  | 15.54%    | 18.49%   |
| GLN     | g-       | t        | Ng-      |          | 15.39% | 14.85%     | 15.29%          | 20.08%     | 15.06%  | 15.71%    | 16.29%   |
| GLN     | g-       | t        | Ot       |          | 2.22%  | 2.15%      | 2.05%           | 2.65%      | 2.30%   | 2.45%     | 2.11%    |
| GLN     | g-       | g-       | Ng+      |          | 0.20%  | 0.15%      | 0.40%           | 0.21%      | 0.23%   | 0.21%     | 0.26%    |
| GLN     | g-       | g-       | Og-      |          | 3.83%  | 3.53%      | 6.54%           | 2.07%      | 3.89%   | 4.14%     | 4.13%    |
| GLN     | g-       | g-       | Nt       |          | 0.93%  | 0.91%      | 1.23%           | 0.41%      | 1.01%   | 1.05%     | 0.84%    |
| GLN     | g-       | g-       | Og+      |          | 1.26%  | 1.44%      | 1.04%           | 1.25%      | 0.77%   | 1.23%     | 0.53%    |
| GLN     | g-       | g-       | Ng-      |          | 2.54%  | 2.86%      | 2.57%           | 2.11%      | 1.50%   | 2.74%     | 1.19%    |
| GLN     | g-       | g-       | Ot       |          | 0.04%  | 0.04%      | 0.06%           | 0.02%      | 0.02%   | 0.02%     | 0.02%    |
| GLU     | g+       | g+       | g+       |          | 0.09%  | 0.06%      | 0.10%           | <0.01%     | 0.08%   | 0.17%     | 0.02%    |
| GLU     | g+       | g+       | t        |          | 0.01%  | 0.01%      | <0.01%          | <0.01%     | <0.01%  | 0.01%     | <0.01%   |
| GLU     | g+       | g+       | g-       |          | 0.03%  | 0.01%      | 0.11%           | <0.01%     | 0.07%   | 0.04%     | <0.01%   |
| GLU     | g+       | t        | g+       |          | 1.31%  | 0.35%      | 1.41%           | 0.12%      | 3.22%   | 2.54%     | 4.01%    |
| GLU     | g+       | t        | t        |          | 0.32%  | 0.06%      | 0.34%           | 0.02%      | 1.02%   | 0.65%     | 0.70%    |
| GLU     | g+       | t        | g-       |          | 1.12%  | 0.30%      | 1.12%           | 0.15%      | 2.70%   | 2.51%     | 2.80%    |
| GLU     | g+       | g-       | g+       |          | 0.19%  | 0.12%      | 0.12%           | <0.01%     | 0.13%   | 0.58%     | 0.04%    |
| GLU     | g+       | g-       | t        |          | 0.03%  | 0.02%      | 0.01%           | <0.01%     | 0.02%   | 0.08%     | <0.01%   |
| GLU     | g+       | g-       | g-       |          | 0.16%  | 0.06%      | 0.28%           | 0.01%      | 0.16%   | 0.45%     | 0.11%    |
| GLU     | t        | g+       | g+       |          | 1.69%  | 2.31%      | 1.00%           | 0.09%      | 1.06%   | 1.16%     | 0.44%    |
| GLU     | t        | g+       | t        |          | 0.34%  | 0.53%      | 0.19%           | 0.01%      | 0.12%   | 0.05%     | 0.04%    |
| GLU     | t        | g+       | g-       |          | 0.35%  | 0.37%      | 0.19%           | 0.13%      | 0.43%   | 0.43%     | 0.14%    |
| GLU     | t        | t        | g+       |          | 5.47%  | 6.50%      | 4.44%           | 2.64%      | 6.03%   | 2.92%     | 5.47%    |
| GLU     | t        | t        | t        |          | 1.59%  | 1.85%      | 1.22%           | 0.62%      | 1.92%   | 0.96%     | 1.49%    |
| GLU     | t        | t        | g-       |          | 6.06%  | 7.65%      | 4.73%           | 3.02%      | 5.65%   | 2.83%     | 4.55%    |
| GLU     | t        | g-       | g+       |          | 0.08%  | 0.08%      | 0.02%           | 0.07%      | 0.13%   | 0.10%     | 0.04%    |
| GLU     | t        | g-       | t        |          | 0.05%  | 0.05%      | 0.04%           | <0.01%     | 0.08%   | 0.04%     | <0.01%   |
| GLU     | t        | g-       | g-       |          | 0.71%  | 0.98%      | 0.30%           | 0.32%      | 0.48%   | 0.34%     | 0.17%    |
| GLU     | g-       | g+       | g+       |          | 1.22%  | 1.06%      | 1.05%           | 1.82%      | 0.85%   | 1.96%     | 0.90%    |
| GLU     | g-       | g+       | t        |          | 0.48%  | 0.51%      | 0.45%           | 0.03%      | 0.28%   | 0.71%     | 0.19%    |
| GLU     | g-       | g+       | g-       |          | 1.12%  | 1.12%      | 0.61%           | 0.66%      | 0.61%   | 1.96%     | 0.30%    |
| GLU     | g-       | t        | g+       |          | 25.45% | 22.78%     | 30.66%          | 35.60%     | 26.51%  | 28.18%    | 29.13%   |
| GLU     | g-       | t        | t        |          | 12.73% | 14.07%     | 10.60%          | 12.16%     | 11.47%  | 10.04%    | 11.02%   |
| GLU     | g-       | t        | g-       |          | 29.69% | 26.24%     | 35.19%          | 39.41%     | 31.70%  | 33.47%    | 34.64%   |
| GLU     | g-       | g-       | g+       |          | 1.48%  | 1.96%      | 0.86%           | 0.76%      | 0.78%   | 1.23%     | 0.78%    |
| GLU     | g-       | g-       | t        |          | 1.28%  | 1.45%      | 0.95%           | 0.20%      | 1.27%   | 1.43%     | 0.80%    |
| GLU     | g-       | g-       | g-       |          | 6.97%  | 9.51%      | 4.03%           | 2.18%      | 3.22%   | 5.16%     | 2.18%    |
| HID     | g+       | Ng+      |          |          | 2.31%  | 0.57%      | 2.20%           | 0.12%      | 4.74%   | 3.30%     | 1.79%    |
| HID     | g+       | Cg-      |          |          | 1.46%  | 0.34%      | 1.82%           | 0.04%      | 3.52%   | 1.85%     | 0.37%    |
| HID     | g+       | Nt       |          |          | 0.04%  | <0.01%     | <0.01%          | <0.01%     | 0.03%   | 0.18%     | 0.01%    |
| HID     | g+       | Cg+      |          |          | 2.59%  | 0.80%      | 3.08%           | 0.43%      | 5.61%   | 3.43%     | 0.74%    |
| HID     | g+       | Ng-      |          |          | 1.78%  | 0.49%      | 2.96%           | 0.32%      | 3.87%   | 2.23%     | 0.75%    |
| HID     | g+       | Ct       |          |          | 0.17%  | <0.01%     | <0.01%          | 0.01%      | 0.23%   | 0.72%     | 0.02%    |
| HID     | t        | Ng+      |          |          | 14.91% | 20.48%     | 11.88%          | 11.56%     | 12.07%  | 12.35%    | 11.66%   |
| HID     | t        | Cg-      |          |          | 3.48%  | 4.79%      | 3.13%           | 2.48%      | 3.22%   | 2.28%     | 3.62%    |
| HID     | t        | Nt       |          |          | 0.90%  | 1.11%      | 0.61%           | 0.85%      | 0.89%   | 0.45%     | 1.70%    |
| HID     | t        | Cg+      |          |          | 9.56%  | 12.60%     | 9.20%           | 6.60%      | 7.83%   | 9.32%     | 4.80%    |
| HID     | t        | Ng-      |          |          | 3.50%  | 4.00%      | 3.93%           | 4.53%      | 3.63%   | 2.53%     | 3.50%    |
| HID     | t        | Ct       |          |          | 2.88%  | 3.66%      | 2.83%           | 2.84%      | 2.86%   | 1.17%     | 4.25%    |
| HID     | g-       | Ng+      |          |          | 7.93%  | 8.75%      | 8.04%           | 5.62%      | 7.84%   | 7.03%     | 9.46%    |
| HID     | g-       | Cg-      |          |          | 16.32% | 14.86%     | 19.19%          | 21.20%     | 12.69%  | 16.47%    | 18.85%   |
| HID     | g-       | Nt       |          |          | 2.00%  | 2.99%      | 1.19%           | 1.15%      | 1.10%   | 1.90%     | 0.74%    |

| Residue | $\chi^1$ | $\chi^2$ | $\chi^3$ | $\chi^4$ | BBIND  | RSS        | RSS             | RSS        | RSS     | RSS       | RSS      |
|---------|----------|----------|----------|----------|--------|------------|-----------------|------------|---------|-----------|----------|
|         |          |          |          |          |        | $\alpha_R$ | Near $\alpha_R$ | $\alpha_L$ | $\beta$ | $P_{III}$ | $P_{IR}$ |
| HID     | g-       | Cg+      |          |          | 4.51%  | 3.31%      | 4.24%           | 5.00%      | 5.95%   | 5.87%     | 5.71%    |
| HID     | g-       | Ng-      |          |          | 20.04% | 14.89%     | 19.85%          | 31.65%     | 19.26%  | 23.93%    | 26.37%   |
| HID     | g-       | Ct       |          |          | 5.62%  | 6.35%      | 5.84%           | 5.59%      | 4.66%   | 4.98%     | 5.67%    |
| HIE     | g+       | Ng+      |          |          | 2.62%  | 1.76%      | 6.11%           | 0.01%      | 3.85%   | 1.79%     | 2.01%    |
| HIE     | g+       | Cg-      |          |          | 0.81%  | 0.21%      | 2.19%           | 0.02%      | 2.35%   | 0.38%     | 0.51%    |
| HIE     | g+       | Nt       |          |          | 0.01%  | <0.01%     | -               | <0.01%     | 0.04%   | 0.01%     | 0.04%    |
| HIE     | g+       | Cg+      |          |          | 2.58%  | 1.10%      | 2.38%           | 0.02%      | 4.19%   | 5.21%     | 3.65%    |
| HIE     | g+       | Ng-      |          |          | 4.68%  | 5.15%      | 6.54%           | 0.01%      | 3.50%   | 4.85%     | 4.32%    |
| HIE     | g+       | Ct       |          |          | 0.31%  | 0.25%      | 0.35%           | -          | 0.35%   | 0.16%     | 0.13%    |
| HIE     | t        | Ng+      |          |          | 13.17% | 16.08%     | 8.79%           | 11.18%     | 13.62%  | 9.54%     | 11.11%   |
| HIE     | t        | Cg-      |          |          | 3.04%  | 4.39%      | 2.18%           | 1.65%      | 2.71%   | 1.48%     | 2.20%    |
| HIE     | t        | Nt       |          |          | 0.78%  | 1.06%      | 0.94%           | 0.44%      | 0.75%   | 0.11%     | 1.67%    |
| HIE     | t        | Cg+      |          |          | 12.90% | 15.17%     | 12.68%          | 4.10%      | 10.70%  | 15.45%    | 5.34%    |
| HIE     | t        | Ng-      |          |          | 6.73%  | 5.73%      | 4.09%           | 3.69%      | 9.45%   | 10.19%    | 5.57%    |
| HIE     | t        | Ct       |          |          | 4.20%  | 2.85%      | 2.40%           | 5.88%      | 7.09%   | 4.52%     | 1<0.01%  |
| HIE     | g-       | Ng+      |          |          | 5.66%  | 6.31%      | 5.33%           | 5.58%      | 3.97%   | 6.41%     | 2.00%    |
| HIE     | g-       | Cg-      |          |          | 16.20% | 14.33%     | 24.23%          | 21.30%     | 13.42%  | 17.77%    | 18.41%   |
| HIE     | g-       | Nt       |          |          | 1.98%  | 2.82%      | 2.19%           | 1.35%      | 1.01%   | 1.26%     | 1.20%    |
| HIE     | g-       | Cg+      |          |          | 4.02%  | 2.94%      | 4.66%           | 6.66%      | 5.92%   | 3.21%     | 8.56%    |
| HIE     | g-       | Ng-      |          |          | 16.03% | 13.90%     | 13.16%          | 34.39%     | 15.18%  | 13.64%    | 22.04%   |
| HIE     | g-       | Ct       |          |          | 4.29%  | 5.96%      | 1.77%           | 3.72%      | 1.90%   | 4.01%     | 1.26%    |
| ILE     | g+       | g+       |          |          | 0.75%  | 0.55%      | 0.71%           | 0.01%      | 0.55%   | 1.51%     | 0.08%    |
| ILE     | g+       | t        |          |          | 43.32% | 22.67%     | 64.45%          | 14.42%     | 44.48%  | 71.16%    | 51.90%   |
| ILE     | g+       | g-       |          |          | 0.10%  | 0.02%      | 0.10%           | 0.02%      | 0.14%   | 0.22%     | 0.11%    |
| ILE     | t        | g+       |          |          | 0.98%  | 0.88%      | 1.56%           | 0.84%      | 1.25%   | 0.84%     | 1.09%    |
| ILE     | t        | t        |          |          | 2.77%  | 1.20%      | 2.99%           | 0.19%      | 5.54%   | 2.81%     | 3.59%    |
| ILE     | t        | g-       |          |          | 0.05%  | 0.05%      | 0.07%           | 0.01%      | 0.07%   | 0.04%     | 0.03%    |
| ILE     | g-       | g+       |          |          | 0.36%  | 0.15%      | 0.29%           | 1.09%      | 0.78%   | 0.28%     | 0.84%    |
| ILE     | g-       | t        |          |          | 28.55% | 39.47%     | 10.93%          | 50.03%     | 3<0.01% | 11.80%    | 29.70%   |
| ILE     | g-       | g-       |          |          | 23.12% | 35.01%     | 18.90%          | 33.39%     | 17.20%  | 11.34%    | 12.67%   |
| LEU     | g+       | g+       |          |          | 0.26%  | 0.02%      | 0.19%           | 0.01%      | 0.87%   | 0.45%     | 0.06%    |
| LEU     | g+       | t        |          |          | 0.19%  | 0.01%      | 0.17%           | <0.01%     | 0.69%   | 0.23%     | 0.22%    |
| LEU     | g+       | g-       |          |          | <0.01% | <0.01%     | <0.01%          | <0.01%     | 0.01%   | 0.01%     | <0.01%   |
| LEU     | t        | g+       |          |          | 22.92% | 24.48%     | 21.31%          | 15.88%     | 29.35%  | 14.13%    | 25.99%   |
| LEU     | t        | t        |          |          | 3.26%  | 3.12%      | 3.25%           | 3.10%      | 5.29%   | 1.96%     | 4.36%    |
| LEU     | t        | g-       |          |          | 1.19%  | 1.49%      | 1.64%           | 0.58%      | 1.12%   | 0.44%     | 0.82%    |
| LEU     | g-       | g+       |          |          | 4.18%  | 2.71%      | 4.14%           | 4.50%      | 7.46%   | 5.70%     | 6.65%    |
| LEU     | g-       | t        |          |          | 66.49% | 66.45%     | 67.31%          | 75.00%     | 54.11%  | 75.59%    | 61.27%   |
| LEU     | g-       | g-       |          |          | 1.51%  | 1.71%      | 1.99%           | 0.92%      | 1.11%   | 1.49%     | 0.63%    |
| LYS     | g+       | g+       | g+       | g+       | 0.01%  | <0.01%     | <0.01%          | -          | 0.03%   | 0.01%     | <0.01%   |
| LYS     | g+       | g+       | g+       | t        | <0.01% | <0.01%     | <0.01%          | -          | <0.01%  | <0.01%    | <0.01%   |
| LYS     | g+       | g+       | g+       | g-       | <0.01% | <0.01%     | <0.01%          | -          | <0.01%  | <0.01%    | <0.01%   |
| LYS     | g+       | g+       | t        | g+       | 0.06%  | 0.03%      | 0.13%           | <0.01%     | 0.06%   | 0.14%     | 0.01%    |
| LYS     | g+       | g+       | t        | t        | 0.01%  | 0.01%      | 0.01%           | -          | 0.01%   | 0.04%     | <0.01%   |
| LYS     | g+       | g+       | t        | g-       | 0.08%  | 0.06%      | 0.06%           | <0.01%     | 0.10%   | 0.13%     | <0.01%   |
| LYS     | g+       | g+       | g-       | g+       | <0.01% | -          | -               | -          | <0.01%  | <0.01%    | -        |
| LYS     | g+       | g+       | g-       | t        | <0.01% | <0.01%     | <0.01%          | -          | <0.01%  | <0.01%    | -        |
| LYS     | g+       | g+       | g-       | g-       | <0.01% | <0.01%     | <0.01%          | -          | <0.01%  | <0.01%    | <0.01%   |
| LYS     | g+       | t        | g+       | g+       | 0.22%  | 0.03%      | 0.22%           | 0.01%      | 0.62%   | 0.39%     | 0.24%    |
| LYS     | g+       | t        | g+       | t        | 0.14%  | 0.02%      | 0.05%           | <0.01%     | 0.42%   | 0.31%     | 0.18%    |
| LYS     | g+       | t        | g+       | g-       | 0.01%  | <0.01%     | <0.01%          | <0.01%     | 0.01%   | <0.01%    | <0.01%   |
| LYS     | g+       | t        | t        | g+       | 2.25%  | 1.03%      | 2.63%           | 0.18%      | 3.47%   | 4.10%     | 3.01%    |
| LYS     | g+       | t        | t        | t        | 0.43%  | 0.07%      | 0.12%           | <0.01%     | 1.50%   | 0.91%     | 0.27%    |
| LYS     | g+       | t        | t        | g-       | 1.21%  | 0.38%      | 1.80%           | 0.11%      | 2.68%   | 2.13%     | 1.32%    |

| Residue | $\chi^1$ | $\chi^2$ | $\chi^3$ | $\chi^4$ | BBIND  | RSS        | RSS             | RSS        | RSS     | RSS       | RSS      |
|---------|----------|----------|----------|----------|--------|------------|-----------------|------------|---------|-----------|----------|
|         |          |          |          |          |        | $\alpha_R$ | Near $\alpha_R$ | $\alpha_L$ | $\beta$ | $P_{III}$ | $P_{IR}$ |
| LYS     | g+       | t        | g-       | g+       | 0.01%  | <0.01%     | 0.03%           | <0.01%     | 0.01%   | 0.01%     | 0.01%    |
| LYS     | g+       | t        | g-       | t        | 0.13%  | 0.02%      | 0.05%           | <0.01%     | 0.34%   | 0.33%     | 0.14%    |
| LYS     | g+       | t        | g-       | g-       | 0.52%  | 0.15%      | 0.63%           | 0.02%      | 1.05%   | 1.16%     | 0.56%    |
| LYS     | g+       | g-       | g+       | g+       | <0.01% | <0.01%     | <0.01%          | -          | <0.01%  | <0.01%    | <0.01%   |
| LYS     | g+       | g-       | g+       | t        | <0.01% | -          | <0.01%          | -          | <0.01%  | <0.01%    | -        |
| LYS     | g+       | g-       | g+       | g-       | -      | -          | -               | -          | -       | -         | -        |
| LYS     | g+       | g-       | t        | g+       | 0.02%  | <0.01%     | 0.01%           | <0.01%     | 0.09%   | 0.02%     | 0.05%    |
| LYS     | g+       | g-       | t        | t        | <0.01% | <0.01%     | <0.01%          | <0.01%     | 0.01%   | <0.01%    | <0.01%   |
| LYS     | g+       | g-       | t        | g-       | 0.02%  | 0.01%      | 0.08%           | <0.01%     | 0.04%   | 0.02%     | 0.02%    |
| LYS     | g+       | g-       | g-       | g+       | <0.01% | -          | <0.01%          | -          | <0.01%  | <0.01%    | <0.01%   |
| LYS     | g+       | g-       | g-       | t        | <0.01% | <0.01%     | <0.01%          | <0.01%     | <0.01%  | <0.01%    | <0.01%   |
| LYS     | g+       | g-       | g-       | g-       | <0.01% | <0.01%     | <0.01%          | <0.01%     | <0.01%  | <0.01%    | <0.01%   |
| LYS     | t        | g+       | g+       | g+       | 0.22%  | 0.29%      | 0.27%           | 0.09%      | 0.14%   | 0.18%     | 0.09%    |
| LYS     | t        | g+       | g+       | t        | 0.19%  | 0.31%      | 0.07%           | 0.07%      | 0.10%   | 0.04%     | 0.11%    |
| LYS     | t        | g+       | g+       | g-       | <0.01% | 0.01%      | <0.01%          | <0.01%     | <0.01%  | <0.01%    | <0.01%   |
| LYS     | t        | g+       | t        | g+       | 2.02%  | 2.54%      | 1.93%           | 1.15%      | 1.84%   | 0.90%     | 2.72%    |
| LYS     | t        | g+       | t        | t        | 0.29%  | 0.42%      | 0.17%           | 0.09%      | 0.22%   | 0.12%     | 0.29%    |
| LYS     | t        | g+       | t        | g-       | 1.42%  | 1.78%      | 1.12%           | 0.64%      | 1.37%   | 0.89%     | 1.26%    |
| LYS     | t        | g+       | g-       | g+       | <0.01% | <0.01%     | <0.01%          | <0.01%     | <0.01%  | <0.01%    | <0.01%   |
| LYS     | t        | g+       | g-       | t        | 0.03%  | 0.06%      | 0.01%           | 0.01%      | 0.01%   | <0.01%    | 0.01%    |
| LYS     | t        | g+       | g-       | g-       | 0.04%  | 0.06%      | 0.02%           | 0.05%      | 0.02%   | 0.01%     | 0.07%    |
| LYS     | t        | t        | g+       | g+       | 2.32%  | 3.04%      | 1.67%           | 1.05%      | 2.11%   | 1.21%     | 1.85%    |
| LYS     | t        | t        | g+       | t        | 0.87%  | 1.17%      | 0.26%           | 0.12%      | 1.01%   | 0.47%     | 1.07%    |
| LYS     | t        | t        | g+       | g-       | 0.03%  | 0.03%      | 0.02%           | 0.02%      | 0.02%   | 0.02%     | 0.01%    |
| LYS     | t        | t        | t        | g+       | 3.52%  | 3.72%      | 3.12%           | 1.69%      | 4.85%   | 2.31%     | 6.09%    |
| LYS     | t        | t        | t        | t        | 0.77%  | 0.75%      | 0.37%           | 0.28%      | 1.39%   | 0.73%     | 0.87%    |
| LYS     | t        | t        | t        | g-       | 4.81%  | 5.95%      | 3.14%           | 3.82%      | 4.90%   | 2.55%     | 5.87%    |
| LYS     | t        | t        | g-       | g+       | 0.02%  | <0.01%     | <0.01%          | 0.01%      | 0.06%   | 0.04%     | 0.01%    |
| LYS     | t        | t        | g-       | t        | 0.36%  | 0.39%      | 0.27%           | 0.13%      | 0.47%   | 0.36%     | 0.27%    |
| LYS     | t        | t        | g-       | g-       | 0.53%  | 0.54%      | 0.54%           | 0.31%      | 0.79%   | 0.35%     | 0.81%    |
| LYS     | t        | g-       | g+       | g+       | 0.01%  | 0.01%      | <0.01%          | <0.01%     | <0.01%  | <0.01%    | <0.01%   |
| LYS     | t        | g-       | g+       | t        | <0.01% | <0.01%     | <0.01%          | <0.01%     | <0.01%  | <0.01%    | <0.01%   |
| LYS     | t        | g-       | g+       | g-       | <0.01% | <0.01%     | <0.01%          | <0.01%     | <0.01%  | -         | <0.01%   |
| LYS     | t        | g-       | t        | g+       | 0.30%  | 0.40%      | 0.21%           | 0.16%      | 0.32%   | 0.12%     | 0.38%    |
| LYS     | t        | g-       | t        | t        | 0.07%  | 0.08%      | 0.05%           | 0.04%      | 0.07%   | 0.03%     | 0.06%    |
| LYS     | t        | g-       | t        | g-       | 0.52%  | 0.70%      | 0.40%           | 0.23%      | 0.48%   | 0.13%     | 0.78%    |
| LYS     | t        | g-       | g-       | g+       | <0.01% | <0.01%     | <0.01%          | <0.01%     | <0.01%  | <0.01%    | <0.01%   |
| LYS     | t        | g-       | g-       | t        | 0.06%  | 0.08%      | 0.05%           | <0.01%     | 0.05%   | 0.02%     | 0.04%    |
| LYS     | t        | g-       | g-       | g-       | 0.15%  | 0.20%      | 0.08%           | 0.05%      | 0.18%   | 0.05%     | 0.15%    |
| LYS     | g-       | g+       | g+       | g+       | 0.11%  | 0.07%      | 0.11%           | 0.29%      | 0.12%   | 0.16%     | 0.08%    |
| LYS     | g-       | g+       | g+       | t        | 0.03%  | 0.04%      | 0.04%           | 0.05%      | 0.03%   | 0.02%     | 0.03%    |
| LYS     | g-       | g+       | g+       | g-       | <0.01% | <0.01%     | <0.01%          | 0.02%      | 0.01%   | 0.01%     | 0.01%    |
| LYS     | g-       | g+       | t        | g+       | 0.61%  | 0.58%      | 1.07%           | 0.46%      | 0.66%   | 0.54%     | 0.59%    |
| LYS     | g-       | g+       | t        | t        | 0.06%  | 0.05%      | 0.06%           | 0.07%      | 0.06%   | 0.05%     | 0.06%    |
| LYS     | g-       | g+       | t        | g-       | 0.39%  | 0.37%      | 0.48%           | 0.36%      | 0.44%   | 0.43%     | 0.45%    |
| LYS     | g-       | g+       | g-       | g+       | <0.01% | <0.01%     | <0.01%          | -          | <0.01%  | <0.01%    | <0.01%   |
| LYS     | g-       | g+       | g-       | t        | <0.01% | <0.01%     | <0.01%          | <0.01%     | <0.01%  | <0.01%    | <0.01%   |
| LYS     | g-       | g+       | g-       | g-       | 0.01%  | 0.02%      | 0.01%           | <0.01%     | <0.01%  | 0.01%     | <0.01%   |
| LYS     | g-       | t        | g+       | g+       | 4.79%  | 4.56%      | 4.27%           | 4.89%      | 4.94%   | 5.49%     | 5.01%    |
| LYS     | g-       | t        | g+       | t        | 2.01%  | 2.35%      | 0.91%           | 1.42%      | 1.83%   | 2.15%     | 1.44%    |
| LYS     | g-       | t        | g+       | g-       | 0.09%  | 0.08%      | 0.04%           | 0.12%      | 0.08%   | 0.10%     | 0.21%    |
| LYS     | g-       | t        | t        | g+       | 14.99% | 13.34%     | 16.48%          | 24.88%     | 14.52%  | 16.08%    | 15.10%   |
| LYS     | g-       | t        | t        | t        | 4.96%  | 6.42%      | 2.50%           | 3.23%      | 3.49%   | 4.39%     | 2.88%    |
| LYS     | g-       | t        | t        | g-       | 22.34% | 23.16%     | 22.72%          | 25.24%     | 19.66%  | 21.00%    | 21.22%   |

| Residue | $\chi^1$ | $\chi^2$ | $\chi^3$ | $\chi^4$ | BBIND  | RSS        | RSS             | RSS        | RSS     | RSS       | RSS      |
|---------|----------|----------|----------|----------|--------|------------|-----------------|------------|---------|-----------|----------|
|         |          |          |          |          |        | $\alpha_R$ | Near $\alpha_R$ | $\alpha_L$ | $\beta$ | $P_{III}$ | $P_{IR}$ |
| LYS     | g-       | t        | g-       | g+       | 0.19%  | 0.21%      | 0.20%           | 0.23%      | 0.09%   | 0.23%     | 0.09%    |
| LYS     | g-       | t        | g-       | t        | 3.67%  | 4.51%      | 1.58%           | 2.64%      | 2.90%   | 3.72%     | 2.39%    |
| LYS     | g-       | t        | g-       | g-       | 5.13%  | 3.62%      | 5.88%           | 12.35%     | 5.32%   | 6.37%     | 5.76%    |
| LYS     | g-       | g-       | g+       | g+       | 0.26%  | 0.41%      | 0.18%           | 0.03%      | 0.09%   | 0.11%     | 0.07%    |
| LYS     | g-       | g-       | g+       | t        | 0.09%  | 0.15%      | 0.05%           | 0.02%      | 0.03%   | 0.04%     | 0.02%    |
| LYS     | g-       | g-       | g+       | g-       | <0.01% | <0.01%     | <0.01%          | 0.03%      | <0.01%  | <0.01%    | <0.01%   |
| LYS     | g-       | g-       | t        | g+       | 6.06%  | 6.26%      | 6.70%           | 4.86%      | 4.97%   | 6.88%     | 4.88%    |
| LYS     | g-       | g-       | t        | t        | 1.04%  | 1.03%      | 1.24%           | 0.73%      | 0.96%   | 1.24%     | 0.68%    |
| LYS     | g-       | g-       | t        | g-       | 7.64%  | 6.31%      | 13.94%          | 6.52%      | 7.44%   | 8.85%     | 9.19%    |
| LYS     | g-       | g-       | g-       | g+       | 0.02%  | 0.02%      | 0.01%           | 0.01%      | 0.01%   | 0.02%     | 0.01%    |
| LYS     | g-       | g-       | g-       | t        | 0.66%  | 0.82%      | 0.56%           | 0.21%      | 0.54%   | 0.65%     | 0.33%    |
| LYS     | g-       | g-       | g-       | g-       | 1.19%  | 1.25%      | 1.30%           | 1.02%      | 0.99%   | 1.20%     | 0.85%    |
| MET     | g+       | g+       | g+       |          | 0.07%  | 0.01%      | 0.08%           | <0.01%     | 0.20%   | 0.15%     | <0.01%   |
| MET     | g+       | g+       | t        |          | 0.07%  | 0.01%      | 0.06%           | <0.01%     | 0.22%   | 0.12%     | 0.01%    |
| MET     | g+       | g+       | g-       |          | <0.01% | <0.01%     | <0.01%          | -          | <0.01%  | <0.01%    | <0.01%   |
| MET     | g+       | t        | g+       |          | 0.73%  | 0.06%      | 0.58%           | 0.06%      | 2.28%   | 1.37%     | 0.79%    |
| MET     | g+       | t        | t        |          | 0.76%  | 0.06%      | 0.72%           | 0.07%      | 2.40%   | 1.41%     | 0.53%    |
| MET     | g+       | t        | g-       |          | 0.79%  | 0.08%      | 1.09%           | 0.04%      | 2.13%   | 1.93%     | 0.47%    |
| MET     | g+       | g-       | g+       |          | <0.01% | <0.01%     | <0.01%          | -          | <0.01%  | 0.01%     | -        |
| MET     | g+       | g-       | t        |          | 0.08%  | <0.01%     | 0.04%           | <0.01%     | 0.25%   | 0.23%     | 0.02%    |
| MET     | g+       | g-       | g-       |          | 0.07%  | <0.01%     | 0.03%           | <0.01%     | 0.32%   | 0.09%     | 0.02%    |
| MET     | t        | g+       | g+       |          | 1.92%  | 2.44%      | 2.27%           | 0.98%      | 1.55%   | 1.11%     | 1.30%    |
| MET     | t        | g+       | t        |          | 2.17%  | 2.94%      | 2.33%           | 0.74%      | 1.60%   | 0.93%     | 1.33%    |
| MET     | t        | g+       | g-       |          | 0.09%  | 0.12%      | 0.07%           | 0.05%      | 0.06%   | 0.02%     | 0.09%    |
| MET     | t        | t        | g+       |          | 4.50%  | 5.14%      | 3.35%           | 2.06%      | 5.26%   | 3.07%     | 5.00%    |
| MET     | t        | t        | t        |          | 2.53%  | 2.39%      | 2.98%           | 1.56%      | 3.71%   | 1.90%     | 3.90%    |
| MET     | t        | t        | g-       |          | 2.55%  | 2.45%      | 2.55%           | 1.91%      | 3.79%   | 1.86%     | 3.67%    |
| MET     | t        | g-       | g+       |          | 0.01%  | 0.01%      | 0.01%           | 0.01%      | 0.01%   | <0.01%    | 0.02%    |
| MET     | t        | g-       | t        |          | 0.52%  | 0.72%      | 0.65%           | 0.21%      | 0.31%   | 0.16%     | 0.46%    |
| MET     | t        | g-       | g-       |          | 1.16%  | 1.80%      | 0.99%           | 0.15%      | 0.54%   | 0.29%     | 0.62%    |
| MET     | g-       | g+       | g+       |          | 0.72%  | 0.33%      | 1.14%           | 1.47%      | 1.04%   | 1.27%     | 1.25%    |
| MET     | g-       | g+       | t        |          | 0.83%  | 0.65%      | 1.11%           | 1.09%      | 0.94%   | 1.08%     | 1.30%    |
| MET     | g-       | g+       | g-       |          | 0.03%  | 0.04%      | 0.02%           | 0.01%      | 0.01%   | 0.03%     | 0.01%    |
| MET     | g-       | t        | g+       |          | 16.40% | 15.74%     | 14.54%          | 18.44%     | 17.15%  | 17.31%    | 18.70%   |
| MET     | g-       | t        | t        |          | 15.82% | 14.04%     | 13.67%          | 18.81%     | 17.96%  | 18.65%    | 19.40%   |
| MET     | g-       | t        | g-       |          | 20.74% | 18.91%     | 18.42%          | 31.16%     | 22.10%  | 22.81%    | 24.69%   |
| MET     | g-       | g-       | g+       |          | 0.94%  | 1.36%      | 0.57%           | 0.30%      | 0.29%   | 0.65%     | 0.16%    |
| MET     | g-       | g-       | t        |          | 11.48% | 12.98%     | 13.23%          | 9.51%      | 7.09%   | 10.57%    | 7.49%    |
| MET     | g-       | g-       | g-       |          | 15.06% | 17.72%     | 19.49%          | 11.37%     | 8.77%   | 13.00%    | 8.76%    |
| PHE     | g+       | g        |          |          | 6.47%  | 0.82%      | 7.04%           | 0.23%      | 15.79%  | 9.44%     | 3.27%    |
| PHE     | g+       | t        |          |          | 0.02%  | <0.01%     | 0.04%           | <0.01%     | 0.03%   | 0.03%     | 0.01%    |
| PHE     | t        | g        |          |          | 39.54% | 59.47%     | 39.89%          | 22.88%     | 25.89%  | 20.18%    | 30.21%   |
| PHE     | t        | t        |          |          | 2.79%  | 3.67%      | 2.14%           | 3.15%      | 2.40%   | 0.89%     | 5.15%    |
| PHE     | g-       | g        |          |          | 45.99% | 29.79%     | 47.36%          | 69.48%     | 52.54%  | 63.16%    | 58.75%   |
| PHE     | g-       | t        |          |          | 5.19%  | 6.25%      | 3.53%           | 4.26%      | 3.35%   | 6.30%     | 2.61%    |
| PRO     | g+       |          |          |          | 62.93% | 58.04%     | 97.66%          | -          | 81.32%  | 65.62%    | 100.00%  |
| PRO     | g-       |          |          |          | 37.07% | 41.96%     | 2.34%           | 100.00%    | 18.68%  | 34.38%    | -        |
| SER     | g+       |          |          |          | 22.69% | 14.33%     | 19.70%          | 1.91%      | 31.69%  | 34.91%    | 26.59%   |
| SER     | t        |          |          |          | 2.05%  | 1.30%      | 1.98%           | 2.39%      | 3.91%   | 1.95%     | 4.36%    |
| SER     | g-       |          |          |          | 75.25% | 84.37%     | 78.31%          | 95.70%     | 64.40%  | 63.14%    | 69.04%   |
| THR     | g+       |          |          |          | 45.14% | 26.50%     | 55.71%          | 13.97%     | 52.54%  | 61.66%    | 57.70%   |
| THR     | t        |          |          |          | 1.71%  | 0.12%      | 0.93%           | 0.36%      | 4.84%   | 1.46%     | 4.78%    |
| THR     | g-       |          |          |          | 53.15% | 73.38%     | 43.36%          | 85.67%     | 42.63%  | 36.88%    | 37.52%   |
| TRP     | g+       | g+       |          |          | 6.57%  | 4.05%      | 14.85%          | 0.05%      | 11.08%  | 5.98%     | 1.85%    |

| Residue | $\chi^1$ | $\chi^2$ | $\chi^3$ | $\chi^4$ | BBIND  | RSS        | RSS             | RSS        | RSS     | RSS       | RSS      |
|---------|----------|----------|----------|----------|--------|------------|-----------------|------------|---------|-----------|----------|
|         |          |          |          |          |        | $\alpha_R$ | Near $\alpha_R$ | $\alpha_L$ | $\beta$ | $P_{III}$ | $P_{IR}$ |
| TRP     | g+       | t        |          |          | 0.51%  | 0.06%      | 0.16%           | <0.01%     | 0.86%   | 1.38%     | 0.37%    |
| TRP     | g+       | g-       |          |          | 3.94%  | 0.95%      | 5.75%           | 0.05%      | 8.22%   | 5.83%     | 3.66%    |
| TRP     | t        | g+       |          |          | 16.59% | 22.66%     | 15.48%          | 10.69%     | 10.90%  | 12.05%    | 11.85%   |
| TRP     | t        | t        |          |          | 10.53% | 12.39%     | 8.80%           | 7.45%      | 11.17%  | 4.74%     | 22.51%   |
| TRP     | t        | g-       |          |          | 13.28% | 21.20%     | 10.92%          | 2.88%      | 8.47%   | 5.17%     | 6.12%    |
| TRP     | g-       | g+       |          |          | 7.19%  | 3.20%      | 8.98%           | 22.40%     | 9.20%   | 9.08%     | 16.93%   |
| TRP     | g-       | t        |          |          | 14.98% | 14.92%     | 12.51%          | 17.46%     | 11.15%  | 20.57%    | 11.69%   |
| TRP     | g-       | g-       |          |          | 26.40% | 20.56%     | 22.55%          | 39.01%     | 28.94%  | 35.20%    | 25.03%   |
| TYR     | g+       | g        |          |          | 8.27%  | 1.44%      | 8.56%           | 0.70%      | 18.84%  | 11.34%    | 4.28%    |
| TYR     | g+       | t        |          |          | 0.02%  | <0.01%     | <0.01%          | <0.01%     | 0.04%   | 0.04%     | 0.08%    |
| TYR     | t        | g        |          |          | 37.99% | 57.87%     | 35.08%          | 26.01%     | 24.75%  | 21.51%    | 25.61%   |
| TYR     | t        | t        |          |          | 2.85%  | 3.88%      | 1.67%           | 2.40%      | 2.38%   | 0.98%     | 5.63%    |
| TYR     | g-       | g        |          |          | 45.57% | 30.22%     | 51.02%          | 68.31%     | 50.71%  | 59.62%    | 61.07%   |
| TYR     | g-       | t        |          |          | 5.29%  | 6.60%      | 3.66%           | 2.58%      | 3.29%   | 6.52%     | 3.33%    |
| VAL     | g+       |          |          |          | 1.36%  | 0.71%      | 1.19%           | 0.18%      | 2.32%   | 1.41%     | 1.33%    |
| VAL     | t        |          |          |          | 55.53% | 81.10%     | 43.65%          | 89.09%     | 50.17%  | 26.78%    | 48.76%   |
| VAL     | g-       |          |          |          | 43.11% | 18.19%     | 55.16%          | 10.73%     | 47.51%  | 71.81%    | 49.91%   |

**Table S2:** (Related to Figure 7) Rotamer definitions for rotameric and non-rotameric  $\chi$ -angles.

| Residue | # $\chi$ angles | Rotamer Structure                | # Rotameric rotamers | Non-rotameric angles | # Non-rotameric $\chi$ bins | Total # rotamers |
|---------|-----------------|----------------------------------|----------------------|----------------------|-----------------------------|------------------|
| ARG     | 4               | $\chi^1, \chi^2, \chi^3, \chi^4$ | 81                   | -                    | -                           | 81               |
| ASN     | 2               | $\chi^1, \chi^2$                 | 3                    | $\chi^2$             | 6                           | 18               |
| ASP     | 2               | $\chi^1, \chi^2$                 | 3                    | $\chi^2$             | 6                           | 18               |
| CYS     | 2               | $\chi^1$                         | 3                    | -                    | -                           | 3                |
| GLN     | 3               | $\chi^1, \chi^2, \chi^3$         | 9                    | $\chi^3$             | 6                           | 54               |
| GLU     | 3               | $\chi^1, \chi^2, \chi^3$         | 9                    | $\chi^3$             | 6                           | 54               |
| HIS     | 2               | $\chi^1, \chi^2$                 | 3                    | $\chi^2$             | 6                           | 18               |
| ILE     | 2               | $\chi^1, \chi^2$                 | 9                    | -                    | -                           | 9                |
| LEU     | 2               | $\chi^1, \chi^2$                 | 9                    | -                    | -                           | 9                |
| LYS     | 3               | $\chi^1, \chi^2, \chi^3, \chi^4$ | 81                   | -                    | -                           | 81               |
| MET     | 4               | $\chi^1, \chi^2, \chi^3$         | 27                   | -                    | -                           | 27               |
| PHE     | 2               | $\chi^1, \chi^2$                 | 3                    | $\chi^2$             | 4                           | 12               |
| PRO     | 1               | $\chi^1$                         | -                    | $\chi^1$             | 2                           | 2                |
| SER     | 1               | $\chi^1$                         | 3                    | -                    | -                           | 3                |
| THR     | 1               | $\chi^1$                         | 3                    | -                    | -                           | 3                |
| TRP     | 2               | $\chi^1, \chi^2$                 | 9                    | -                    | -                           | 9                |
| TYR     | 2               | $\chi^1, \chi^2$                 | 3                    | $\chi^2$             | 4                           | 12               |
| VAL     | 1               | $\chi^1$                         | 3                    | -                    | -                           | 3                |
